# Supplementary material for: Design and rationale of the ATHENA study – A 12-month, multicentre, prospective study evaluating the outcomes of a de novo everolimus-based regimen in combination with reduced cyclosporine or tacrolimus versus a standard regimen in kidney transplant patients: study protocol for a randomised controlled trial
Source: PubMed Central journal article supplement (PMC4756406; doi:10.1186/s13063-016-1220-9), 2016-02-17
Supplement: 13063_2016_1220_MOESM1_ESM.pdf [file 13063_2016_1220_MOESM1_ESM.pdf]

## **List of Ethics Committees**

### **Lead Ethics Commission Germany and France**

Hamburg Medical Association  
Ethics Committee  
Humboldtstr. 67a  
22083 Hamburg  
Tel: 040-202299240  
Fax: 040-202299410

Committee to Protect People  
Southwest and Overseas I and II  
ARS Midi-Pyrénées  
10 chemin du raisin  
31050 TOULOUSE Cedex 9  
Tel: 05.34.30.27.55  
Fax: 05.34.30.27.38

### **Participating Ethics Committees**

Ethics Committee at the Medical Faculty of the RWTH Aachen  
Pauwelsstr. 30  
52074 Aachen  
Tel: 0241-8089963  
Fax: 0241-8082012

State Office for Health and Social Affairs  
Ethics Committee of Berlin  
Fehrbelliner Platz 1  
10707 Berlin  
Tel: 030-90229 1226  
Fax: 030-90283383

Ruhr-University Bochum  
Medical school  
Ethics Committee  
Bürkle-de-la-Camp-Platz 1  
44789 Bochum  
Tel: 0234-3026421  
Fax: 0234-3026426

Technical University Dresden  
Medical Faculty Carl Gustav Carus  
Ethics Committee  
Fetscherstr. 74  
01307 Dresden  
Tel: 0351-4582992  
Fax: 0351-4584369

University of Erlangen-Nuremberg  
Medical School  
Ethics Committee  
Krankenhausstr. 12  
91054 Erlangen  
Tel: 09131-85 22210  
Fax: 09131-85 26021

University Hospital Essen  
Medical Faculty of the University of Duisburg-Essen  
Ethics Committee  
Robert-Koch-Straße 9-11  
45147 Essen  
Tel: 0201-723 3637  
Fax: 0201-723 5837

Ethics Committee of the Faculty of Medicine of the Johann Wolfgang Goethe University  
University Hospital  
Theodor-Stern-Kai 7  
60590 Frankfurt am Main  
Tel: 069-63014597  
Fax: 069-630183434

University of Freiburg  
Ethics Committee  
Engelberger Str. 21  
79106 Freiburg  
Tel: 0761-27072600  
Fax: 0761-27072510

Ethics Committee of the Hannover Medical School  
Carl-Neuberg-Str. 1  
30625 Hannover  
Tel: 0511-5329229  
Fax: 0511-5325423

Ethics Committee of the Medical Faculty of Heidelberg  
Alte Glockengießerei 11/1  
69115 Heidelberg  
Tel: 06221-338220  
Fax: 06221-338222

Ethics Committee of the Medical Faculty of the University of Kiel  
Schwanenweg 20  
24105 Kiel  
Tel: 0431-5971809  
Fax: 0431-5975333

Ethics Committee of the medical association of Rheinland Pfalz  
Deutschhausplatz 3  
55116 Mainz  
Tel: 06131-2882263  
Fax: 06131-2882266

University Hospital Tübingen  
Ethics Committee at the Faculty of Medicine Tübingen  
Gartenstraße 47  
72074 Tübingen  
Tel: 07071-2977661  
Fax: 07071-295965

University Hospital Münster  
Ethics Committee of the Medical Association of Westfalen-Lippe  
Gartenstr. 210-214  
48147 Münster  
Tel: 0251-9292460  
Fax: 0251-9292478
